# Supplementary material for: Trends and Risk Factors for Antimicrobial-Resistant Neisseria gonorrhoeae, Melbourne, Australia, 2007 to 2018
Source: PubMed Central journal article supplement (PMC6761556; doi:10.1128/aac.01221-19), 2019-09-23

## SUPPLEMENTARY MATERIAL

**Table S1: Australian Gonococcal Surveillance Program (AGSP) interpretative criteria for *Neisseria gonorrhoeae* Minimum Inhibitory Concentration (MIC) values.**

| Antimicrobial           | MIC (mg/L) |                                                |                  |
|-------------------------|------------|------------------------------------------------|------------------|
|                         | Sensitive  | Less susceptible /<br>decreased susceptibility | Resistant        |
| <b>Category 1</b>       |            |                                                |                  |
| Ceftriaxone             | ≤ 0.03     | 0.06–0.125                                     | Not defined      |
| Azithromycin            | ≤ 0.5      | Not defined                                    | ≥1 <sup>a</sup>  |
| <b>Category 2</b>       |            |                                                |                  |
| Penicillin <sup>b</sup> | ≤ 0.03     | 0.06–0.5                                       | ≥1               |
| Ciprofloxacin           | ≤ 0.03     | 0.06–0.5                                       | ≥1               |
| Spectinomycin           | ≤64        | Not defined                                    | ≥128             |
| Tetracycline            | ≤ 8        | Not defined                                    | ≥16 <sup>c</sup> |

<sup>a</sup> Low-level resistance defined as 1-128 mg/L; high-level resistance defined as ≥256 mg/L (1).

<sup>b</sup> All penicillinase-producing *N. gonorrhoeae* (PPNG) isolates are considered resistant to penicillin, irrespective of the MIC value.

<sup>c</sup> The AGSP monitors for high level resistance to tetracycline (TRNG) only. Tetracyclines are rarely, if ever used for treatment of gonorrhoea in Australia. As such, TRNG is used for epidemiological surveillance purposes only.

**Table S2: Number of *Neisseria gonorrhoeae* isolates received for antimicrobial surveillance testing from individuals attending Melbourne Sexual Health Centre, January 2007 – December 2018.**

| <b>Year</b> | <b>Number of isolates</b> |
|-------------|---------------------------|
| 2007        | 192                       |
| 2008        | 191                       |
| 2009        | 271                       |
| 2010        | 387                       |
| 2011        | 413                       |
| 2012        | 551                       |
| 2013        | 708                       |
| 2014        | 723                       |
| 2015        | 878                       |
| 2016        | 805                       |
| 2017        | 1,117                     |
| 2018        | 1,352                     |

## **REFERENCES**

1. Lahra MM, Enriquez RP. 2017. Australian Gonococcal Surveillance Programme annual report, 2015. Commun Dis Intell Q Rep 41:E.

**Supplementary Figure 1.** Proportion of *Neisseria gonorrhoeae* isolates from individuals attending Melbourne Sexual Health Centre displaying resistance or reduced susceptibility to antimicrobials, 2007 – 2018 stratified by sexual risk group: (A) Heterosexual males; (B) Men who have sex with men (MSM); (C) Females.

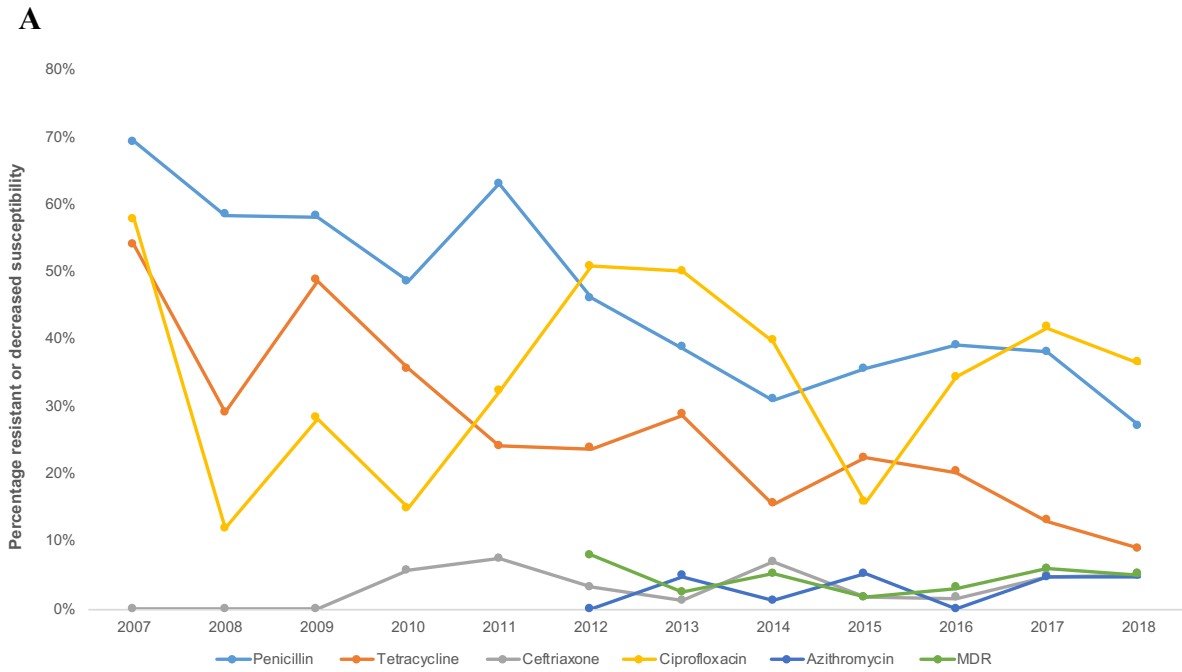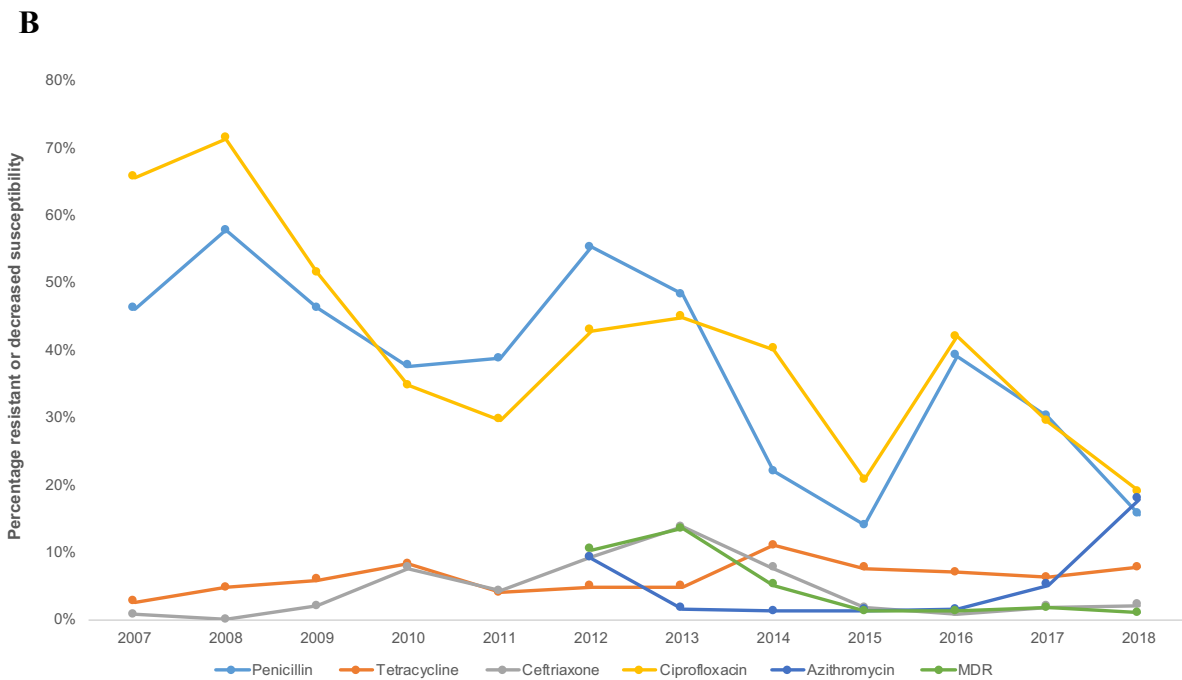

C

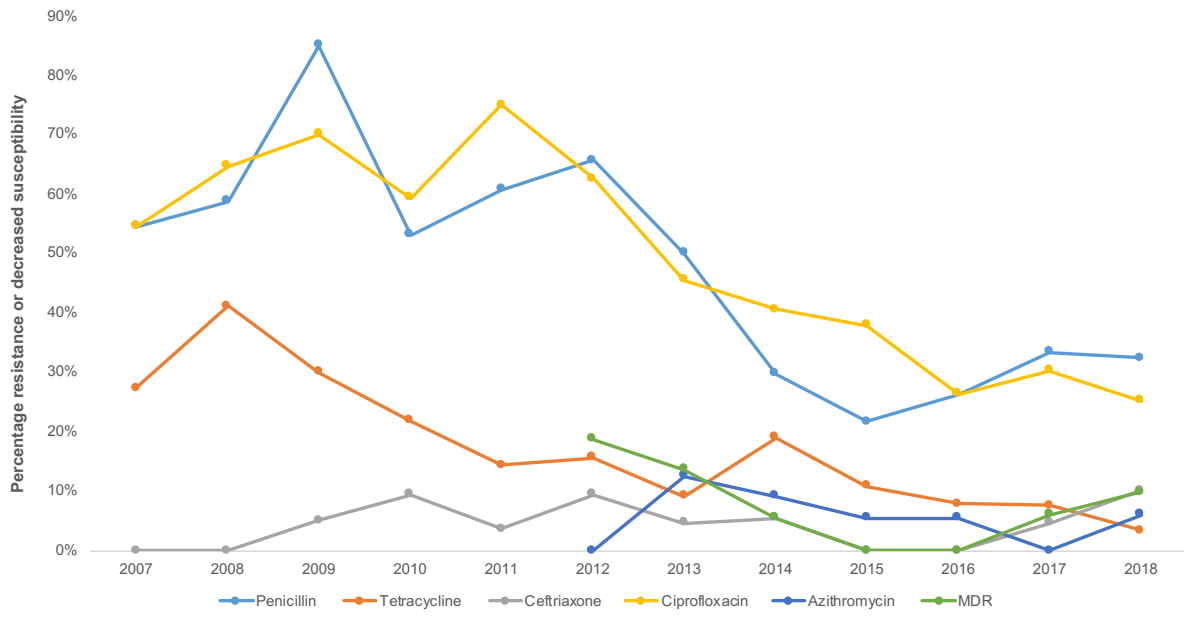

Supplement: AAC.01221-19-s0001.pdf [file AAC.01221-19-s0001.pdf]
